# Supplementary material
Source: publisher site journal article supplement (https://www.spandidos-publications.com/3423/downloadSupplementary)
Supplement: Supplementary file 1 [file downloadSupplementary]

## Sheet: g2_VS_g1_p005fc2_m
Table SI.
Probe ID	t-test P-value	Fold-change			Normalized signal (log2) of g2			Detection of g2			Normalized signal (log2) of g1			Detection of g1			Annotation
		fold-change	fold-change (abs)	Regulation	B1_NS	B2_NS	B3_NS	B1_flags	B2_flags	B3_flags	A1_NS	A2_NS	A3_NS	A1_flags	A2_flags	A3_flags	ProbeName.1	GeneSymbol	ProbeSeq	Start	Chromosome	End	Strand	ControlType	Ensembl	Gene_ID	Accession	Description	GO	TIGRID
A_23_P42257	0.0123023	12.8505	12.8505	up	6.60982	4.46513	5.46149	P	P	P	2.57831	2.31065	0.85961	A	A	A	A_23_P42257	IER3	TGTGAGATGTTCCCCCTGCTGTAAATGCAGGTCTCTTGGTATTTATTGAGCTTTGTGGGA	30711371	chr6	30711312	-	FALSE	ENST00000376377	8870	NM_003897	immediate early response 3	GO:0005515|GO:0007095|GO:0043066|GO:0045732|GO:0008630|GO:2001020|GO:0006915|GO:0005634|GO:0009653|GO:0006282|GO:0050728|GO:0001562|GO:2000377|GO:0016021|GO:0045820|GO:0046822|GO:0003085	THC2759397
A_24_P356453	0.0173667	9.39969	9.39969	up	5.07239	4.65828	5.48559	P	P	P	2.80294	1.02216	1.01647	A	A	A	A_24_P356453	COA3	TTATGGTTACACCTTCTACTCGATTTCCCAGGAGCGTTTCCTAGATGAGCTAGAAGACGA	40950487	chr17	40950128	-	FALSE	ENST00000328434	28958	NM_001040431	cytochrome c oxidase assembly factor 3	GO:0033617|GO:0005739|GO:0005515|GO:0031305|GO:0070131	THC2618149
A_33_P3368495	0.00137874	9.08032	9.08032	up	4.32207	4.0862	5.00654	P	P	P	0.832656	1.1885	1.82917	A	A	A	A_33_P3368495	---	GCTCGTGTGACTTTGCTGACCTTTTATGTTTTCTATGGGCAATAAAGGCCAAGAGAGCTC	38692271	chr22	38692212	-	FALSE	---	---	AK057067	---	---	THC2494002
A_23_P21485	1.44595e-05	8.61437	8.61437	up	3.99326	4.01103	3.83295	P	P	P	0.902657	0.806236	0.812672	A	A	A	A_23_P21485	PID1	TGCTCCTTCCTAAAAGTCTGTTTTCAATCCTGGTAATATTAGGGGCACTGCGGCACCTAA	229889030	chr2	229888971	-	FALSE	ENST00000392055	55022	NM_017933	phosphotyrosine interaction domain containing 1	GO:0070346|GO:2000045|GO:0071398|GO:0005737|GO:0045944|GO:0044320|GO:0071356|GO:0045444|GO:0071354|GO:2001170|GO:0090298|GO:2001171|GO:0046627|GO:0051881|GO:0010628|GO:2001274|GO:0006112|GO:0070584|GO:0071345|GO:0090005|GO:0001933|GO:0005654|GO:2000377|GO:0010635|GO:2000379	THC2606128
A_32_P32254	0.0426066	7.31744	7.31744	up	4.68702	4.51856	5.82537	P	P	P	3.42372	0.811721	0.937563	A	A	A	A_32_P32254	COL6A1	ATAGTGATGTGTTCGACGTTTTATCAAAGGCCCCCTTTCTATGTTCATGTTAGTTTTGCT	47424895	chr21	47424836	+	FALSE	ENST00000361866	1291	NM_001848	"collagen, type VI, alpha 1"	GO:0048407|GO:0005578|GO:0005576|GO:0005589|GO:0035987|GO:0005765|GO:0001649|GO:0070208|GO:0042383|GO:0031012|GO:0043234|GO:0071230|GO:0016020|GO:0022617|GO:0007411|GO:0030198|GO:0030574|GO:0005788|GO:0007155|GO:0070062	THC2582340
A_23_P129704	0.018179	5.96105	5.96105	up	4.73417	4.31983	5.21725	P	P	P	2.47986	1.06979	2.67312	A	A	A	A_23_P129704	TERF2IP	AATGCTGTATTCATTTTGCTAACTTAGTATTTGGGTACCCTGCTCTTTGGCTGTTCTTTT	75691096	chr16	75691037	+	FALSE	ENST00000300086	54386	NM_018975	"telomeric repeat binding factor 2, interacting protein"	GO:0005515|GO:0000781|GO:0006355|GO:0030870|GO:0048239|GO:0042162|GO:0010833|GO:0005634|GO:0000228|GO:0005635|GO:0031848|GO:0010569|GO:0006351|GO:0005737|GO:0051092|GO:0000723|GO:0032205|GO:0005654|GO:0043123|GO:0007004|GO:0070198|GO:0000784|GO:0000783	THC2470058
A_23_P29248	0.0390481	5.93165	5.93165	up	5.43353	6.5201	6.70433	P	P	P	4.80953	2.63052	2.60985	P	A	A	A_23_P29248	TST	CCTGAGCCGTGACCTCTTCTGCTTACTGTAACTGCGGCCGGTTTAGTGACCCCATGACTT	37407072	chr22	37407013	-	FALSE	ENST00000403892	7263	NM_003312	thiosulfate sulfurtransferase (rhodanese)	GO:0005743|GO:0044281|GO:0005615|GO:0035928|GO:0005739|GO:0034641|GO:0000096|GO:0000098|GO:0005759|GO:0009440|GO:0030855|GO:0051029|GO:0004792|GO:0008097|GO:0070221|GO:0070062	THC2488158
A_23_P17345	0.0492075	5.73395	5.73395	up	6.36524	4.29186	6.25317	P	P	P	4.30719	2.4935	2.50277	P	A	A	A_23_P17345	MAFB	ATTTTTAAGTTCCCATTTGAAATTGCTGGCGCTGCTGGCCGGATGCATTTTTGAGTTTGT	39314869	chr20	39314810	-	FALSE	ENST00000373313	9935	NM_005461		GO:0005515|GO:0005667|GO:0033077|GO:0042472|GO:0003700|GO:0007379|GO:0007585|GO:0048538|GO:0005634|GO:0006351|GO:0043565|GO:0007423|GO:0021572|GO:0021571|GO:0045647|GO:0045944|GO:0035284|GO:0008134	THC2469086
A_33_P3271490	0.0184272	5.33958	5.33958	up	3.87961	4.94566	4.11211	P	P	P	2.74266	1.04946	1.58684	A	A	A	A_33_P3271490	RBMS1	GTAAAACAGCAGCATAGGGCTTTTAAAAGGTAGTCAATAAAAGTTGCTGAAATTTTGGCT	161130579	chr2	161130520	-	FALSE	ENST00000392753	5937	NM_016836	"RNA binding motif, single stranded interacting protein 1"	GO:0006260|GO:0005515|GO:0006396|GO:0003690|GO:0003697|GO:0000166|GO:0003723|GO:0005634	THC2482023
A_23_P62901	0.0268094	5.17262	5.17262	up	4.07628	5.05073	5.47824	P	P	P	3.46495	1.59459	2.07887	A	A	A	A_23_P62901	BTG2	TTTTAGAAGCAGCCTCATGGTCTCATGCTTAATCTTGTCTCTCTTCTCTTCTTTATGATG	203278513	chr1	203278454	+	FALSE	ENST00000475157	7832	NM_006763	"BTG family, member 2"	GO:0005515|GO:0008306|GO:0017148|GO:0014070|GO:0021542|GO:2000178|GO:0008285|GO:0021954|GO:0060213|GO:0043434|GO:0035914|GO:0009952|GO:0031175|GO:0006351|GO:0006974|GO:0009612|GO:0043524|GO:0001077|GO:0006281|GO:0045944|GO:0051602|GO:0006479|GO:0070062	THC2559986
A_32_P45738	0.0447072	5.07788	5.07788	up	6.6796	4.7117	6.1948	P	P	P	3.01326	4.08095	3.88519	A	P	A	A_32_P45738	PGAM1	TAGTATATATAATACAAAACAATAACCCTTCTGGGGTTTCTTGTGGCGGTTGAAATAGTC	99192915	chr10	99192856	+	FALSE	ENST00000334828	5223	NM_002629	phosphoglycerate mutase 1 (brain)	GO:0045730|GO:0005515|GO:0019901|GO:0004082|GO:0004083|GO:0005975|GO:0006094|GO:0044281|GO:0043456|GO:0006096|GO:0005829|GO:0006110|GO:0005737|GO:0016020|GO:0016311|GO:0009405|GO:0006006|GO:0004619|GO:0070062	NP1202408
A_23_P137016	0.0463378	4.95327	4.95327	up	11.0908	9.19773	9.62464	P	P	P	7.85656	7.33817	8.34275	P	P	P	A_23_P137016	SAT1	GAAATAATAGAATGAGCACCCATTCCAAAGCTTTATTACCAGTGGCGTTGTTGCATGTTT	23804114	chrX	23804055	+	FALSE	ENST00000474223	6303	NM_002970	spermidine/spermine N1-acetyltransferase 1	GO:0005515|GO:0001525|GO:0032918|GO:0044281|GO:0005829|GO:0005622|GO:0034641|GO:0006596|GO:0019809|GO:0042127|GO:0006595|GO:0004145|GO:0009447	THC2552940
A_24_P304051	0.00675547	4.94223	4.94223	up	7.69993	6.83836	7.52061	P	P	P	4.97778	4.43554	5.62147	P	P	P	A_24_P304051	GSTO1	GTTCTGACTAATAAGAAGACGACCTTCTTTGGTGGCAATTCTATCTCTATGATTGATTAC	106025901	chr10	106025842	+	FALSE	ENST00000493946	9446	NM_004832	glutathione S-transferase omega 1	GO:0005515|GO:0006805|GO:0014810|GO:0042178|GO:0010881|GO:0044281|GO:0004364|GO:0045174|GO:0005829|GO:0060316|GO:0019852|GO:0050610|GO:0005737|GO:0010880|GO:0060315|GO:0016491|GO:0071243|GO:0070062|GO:0055114	THC2600032
A_23_P51487	0.0383619	4.73981	4.73981	up	4.44591	5.23918	3.6573	P	P	P	3.27271	1.37617	1.56972	A	A	A	A_23_P51487	GBP3	AATCCTAAAGCATAAGTTAGTCTTTTCCTGATTCTTAAAGGTCATACTTGAAATCCTGCC	89472608	chr1	89472549	-	FALSE	ENST00000489444	2635	NM_018284	guanylate binding protein 3	GO:0005515|GO:0051607|GO:0005737|GO:0016020|GO:0008152|GO:0003924|GO:0005525	THC2491572
A_24_P272548	0.0128389	4.65206	4.65206	up	5.33621	5.82811	5.27809	P	P	P	2.46847	3.486	3.64362	A	A	A	A_24_P272548	---	CCAAGAAAGTGGTGAATTCCCTGTTTGAGAAAAGGCGTAAGAATTTTGGTATTGGACAGG	112740403	chr12	112740344	-	FALSE	ENST00000469026	---	---	---	---	THC2696148
A_33_P3348244	0.0219995	4.16805	4.16805	up	7.2507	6.25079	7.66027	P	P	P	4.8151	4.49093	5.71986	P	P	P	A_33_P3348244	BRI3	GACAACTCAATGAAGCACTGCTTTTATTTTTTGCAGTCTTCAATTTGAGAAAGGTGAGAA	97920803	chr7	97920744	+	FALSE	ENST00000297290	25798	NM_015379	brain protein I3	GO:0016021	THC2525435
A_24_P307486	0.0118811	4.14234	4.14234	up	6.73342	6.11373	7.17464	P	P	P	4.39735	4.81098	4.81443	P	P	P	A_24_P307486	---	AAGGATTTGATTATAAATGTTCCTCCTTTCACAGAATTATTCCAGGGTTTATGTGTCAGG	31487938	chr6	31487879	-	FALSE	ENST00000403866	---	---	---	---	---
A_22_P00006968	0.0427109	4.13637	4.13637	up	2.72082	4.31219	2.83004	P	P	P	0.89101	2.15865	0.844876	A	A	A	A_22_P00006968	OSER1-AS1	GACTCGGACACCAGCCCTCGCCTCCTGGTGATCTTTTAGGTCCTGCAGAGAAGTGAAGAG	42839996	chr20	42839937	+	FALSE	ENST00000435163	100505783	NR_038338	OSER1 antisense RNA 1 (head to head)	---	THC2508607
A_23_P27215	0.0408096	4.1303	4.1303	up	9.42408	9.1824	10.7287	P	P	P	7.46589	7.9294	8.21559	P	P	P	A_23_P27215	UBB	CCAGTGACACCATCGAAAATGTGAAGGCCAAGATCCAGGATAAAGAAGGCATCCCTCCCG	16285564	chr17	16285505	+	FALSE	ENST00000614404	7314	NM_018955	ubiquitin B	GO:0005515|GO:0002474|GO:0010467|GO:0006367|GO:0007220|GO:0019221|GO:0007249|GO:0019058|GO:0002756|GO:0034220|GO:0007173|GO:0007219|GO:0002755|GO:0007179|GO:0006977|GO:0000209|GO:0038124|GO:0038123|GO:0005975|GO:0005978|GO:0034134|GO:0042059|GO:0000122|GO:0019068|GO:0002224|GO:0006281|GO:0008543|GO:0007623|GO:0035666|GO:0034166|GO:0005654|GO:0000278|GO:0038095|GO:0034162|GO:0010008|GO:0043005|GO:…	THC2583951
A_24_P15821	0.0469508	4.10632	4.10632	up	8.85356	7.86393	9.56357	P	P	P	6.72164	6.62126	7.22567	P	P	P	A_24_P15821	---	GTTGTAAGAGTTCCTGCTTTCACAGAATTATTCCAGGGTTTATGTCAGGTGGTGACTTCA	57485530	chr11	57485516	-	FALSE	ENST00000530952	---	---	---	---	---
A_24_P161403	0.0308349	4.00111	4.00111	up	8.00768	7.1628	8.64176	P	P	P	5.88124	5.79147	6.42011	P	P	P	A_24_P161403	---	CTGCTTTCACAGAATTATTCCCGGGGTTATGTGTCAGCGTGGTGACTTCACAAGTCATAA	166783830	chr3	166783771	+	FALSE	ENST00000469748	---	---	---	---	THC2552249
A_24_P340679	0.0422863	3.99229	3.99229	up	8.6148	7.57535	9.1395	P	P	P	6.43544	6.36246	6.88762	P	P	P	A_24_P340679	PPIA	AAGGATTTGGTTGTAAGGGCTCCCGCTTTCACAGAATTATTCCAGGGTTTATGTGTCAGG	44839301	chr7	44839021	+	FALSE	ENST00000486414	5478	NM_021130	peptidylprolyl isomerase A (cyclophilin A)	GO:0005515|GO:0000413|GO:0019076|GO:0030260|GO:0050714|GO:0019058|GO:0045069|GO:0005634|GO:0050900|GO:0005615|GO:0005829|GO:0006457|GO:0016032|GO:0006278|GO:0045070|GO:0070062|GO:0042277|GO:0019061|GO:0003755|GO:0030168|GO:0046790|GO:0005576|GO:0019068|GO:0034389|GO:0016020|GO:0007596|GO:0002576|GO:0051082|GO:0005925	THC2542501
A_24_P203226	0.0470688	3.97418	3.97418	up	8.79364	7.80317	9.46662	P	P	P	6.68352	6.60108	7.19007	P	P	P	A_24_P203226	PPIAL4B	CACTGGTGACAAGTCCATCTATGGGGAGAAATTTGATGATGAGAACCTCATCCGAAAGCA	144363956	chr1	144363897	-	FALSE	ENST00000577856	653505	NM_001143883	peptidylprolyl isomerase A (cyclophilin A)-like 4B	GO:0000413|GO:0005737|GO:0006457|GO:0003755|GO:0070062	THC2487803
A_24_P173325	0.0125386	3.91877	3.91877	up	10.3454	10.4376	10.5418	P	P	P	8.92822	8.09142	8.25922	P	P	P	A_24_P173325	UBA52	ATTATTGAGCCTTCTCTCCGCCAGCTTGCCCAGAAATACAACTGCGACAAGATGATCTGC	18685777	chr19	18685718	+	FALSE	ENST00000598780	7311	NM_001033930	ubiquitin A-52 residue ribosomal protein fusion product 1	GO:0005515|GO:0002474|GO:0010467|GO:0006367|GO:0007220|GO:0019221|GO:0007249|GO:0019058|GO:0005765|GO:0006412|GO:0006413|GO:0006414|GO:0002756|GO:0007173|GO:0007219|GO:0002755|GO:0007179|GO:0006977|GO:0000209|GO:0005975|GO:0034134|GO:0005978|GO:0000122|GO:0019068|GO:0002224|GO:0006281|GO:0008543|GO:0007623|GO:0034166|GO:0005654|GO:0000278|GO:0034162|GO:0010008|GO:0032479|GO:0034142|GO:0005886|GO:…	THC2581957
A_23_P61371	0.0446634	3.90209	3.90209	up	4.06841	4.69007	3.31121	P	P	P	1.94842	0.997214	2.92656	A	A	A	A_23_P61371	TMEM173	GTGTCTTCAACCTGTGAAATGGGATCATAATCACTGCCTTACCTCCCTCACGGTTGTTGT	138855656	chr5	138855597	-	FALSE	ENST00000330794	340061	NM_198282	transmembrane protein 173	GO:0005515|GO:0048471|GO:0032479|GO:0033160|GO:0005886|GO:0035458|GO:0005741|GO:0002218|GO:0042993|GO:0042803|GO:0032092|GO:0035438|GO:0042802|GO:0051607|GO:0045944|GO:0032481|GO:0030659|GO:0031625|GO:0005777|GO:0032608|GO:0005794|GO:0019901|GO:0006915|GO:0071360|GO:0002230|GO:0045087|GO:0005789|GO:0016021|GO:0008134	THC2462351
A_23_P102122	0.0235909	3.8676	3.8676	up	9.43087	8.64957	9.98333	P	P	P	7.52394	7.12324	7.78495	P	P	P	A_23_P102122	ARPC2	AAGCGGCTGGCAACTGAAGGCTGGAACACTTGCTACTGGATAATCGTAGCTTTTAATGTT	219118717	chr2	219118658	+	FALSE	ENST00000470146	10109	NM_152862	"actin related protein 2/3 complex, subunit 2, 34kDa"	GO:0005515|GO:0034314|GO:0043005|GO:0005886|GO:0005885|GO:0006928|GO:0045202|GO:0015629|GO:0005829|GO:0010592|GO:0005737|GO:0051015|GO:1900026|GO:0007411|GO:0031252|GO:0070062|GO:0035650|GO:0005794|GO:0048013|GO:0071933|GO:0045087|GO:0005200|GO:0019894|GO:0005925|GO:0038096|GO:0005768	THC2513590
A_23_P162746	0.0201285	3.86021	3.86021	up	4.36491	4.55932	4.45658	P	P	P	1.83848	2.69575	2.82338	A	A	A	A_23_P162746	CRYL1	TACTCTGGGGCCCTGCATTTATGAGGCACCTACCTTCATTTTGCTAACGCTTATTCTGAA	20977891	chr13	20977832	-	FALSE	ENST00000298248	51084	NM_015974	"crystallin, lambda 1"	GO:0005794|GO:0005886|GO:0005730|GO:0003857|GO:0005634|GO:0070403|GO:0042803|GO:0005829|GO:0050104|GO:0005737|GO:0006631|GO:0055114|GO:0070062	THC2466931
A_32_P44568	0.00665974	3.84788	3.84788	up	5.88169	5.11756	5.78868	P	P	P	3.57776	3.90503	3.55959	A	P	A	A_32_P44568	LDHA	TTTCCCAAAAACCATGTTATTGGAAGTGGTTGCAATCTGGATTCAGCCCAATTCCGTTAC	14921876	chr9	14921817	-	FALSE	ENST00000397561	3939	NM_005566	lactate dehydrogenase A	GO:0005515|GO:0044262|GO:0005634|GO:0044281|GO:0006096|GO:0005829|GO:0005739|GO:0004459|GO:0016020|GO:0006090|GO:0021762|GO:0035686|GO:0031668|GO:0044237|GO:0070062|GO:0055114	THC2518496
A_24_P58727	0.0354039	3.81472	3.81472	up	7.55634	6.49725	8.07368	P	P	P	4.97573	5.2903	6.1908	P	P	P	A_24_P58727	---	GGTAATAAGGGTTCTTGCTTTCACAGAATTATCAGATTTATGTGTCAGGGTGGTGACTTC	76039308	chr15	76039248	+	FALSE	ENST00000567565	---	---	---	---	---
A_33_P3239414	0.0320343	3.79904	3.79904	up	7.64787	6.58711	7.95622	P	P	P	5.32972	5.42983	5.91042	P	P	P	A_33_P3239414	---	AATTACTCCAGGGATTATGTGTCAGGGTGGTAACTTTACACACCATAATGGCACTGGTGG	75991164	chr7	75991105	+	FALSE	ENST00000395416	---	---	---	---	---
A_23_P34176	0.0449696	3.66805	3.66805	up	2.60093	4.17533	2.90553	P	P	P	2.0591	1.43319	0.811196	A	A	A	A_23_P34176	WWC3	GTTTTAGAAGCAGTTCTGGTCTCAAAACCATCAGGATCCTGCCACCAGGGTTCTTTTGAA	10112292	chrX	10112233	+	FALSE	ENST00000380861	55841	NM_015691	WWC family member 3	GO:0046621|GO:0035331|GO:0032947|GO:0000122|GO:0019900|GO:0005829	THC2493147
A_23_P80362	0.0161138	3.62696	3.62696	up	7.00485	6.15401	7.29394	P	P	P	4.81029	4.76881	5.42597	P	P	P	A_23_P80362	NHP2L1	TCATTCTGCACCTGCCGCTGCTGTGTGAAGACAAGAATGTGCCCTACGTGTTTGTGCGCT	42071130	chr22	42071071	-	FALSE	ENST00000463675	4809	NM_005008	NHP2 non-histone chromosome protein 2-like 1 (S. cerevisiae)	GO:0005515|GO:0008380|GO:0010467|GO:0031428|GO:0003723|GO:0042254|GO:0005730|GO:0005634|GO:0043234|GO:0030515|GO:0000398|GO:0005654|GO:0005681	THC2554847
A_33_P3291394	0.0386116	3.6004	3.6004	up	4.83115	4.20455	4.26162	P	P	P	2.0585	3.39758	1.8682	A	A	A	A_33_P3291394	GPN1	GCTGATTATTCCTTGGCCTTTCCCTTGTATTTATGCAAGGAAGGATATACTGAGCTGATA	27873323	chr2	27873264	+	FALSE	ENST00000616939	11321	NM_007266	GPN-loop GTPase 1	GO:0005515|GO:0005737|GO:0008152|GO:0003924|GO:0005634|GO:0005525	THC2602974
A_33_P3299436	0.0160651	3.54392	3.54392	up	11.9773	11.0867	11.3945	P	P	P	9.59875	9.82886	9.69039	P	P	P	A_33_P3299436	---	TCTGCTTCATCCCTCTCAAGTAGTGGCTCAGCTAATAAAGGCGCACATGGTTCCAAAAAA	234492472	chr1	234492413	-	FALSE	---	---	---	---	---	---
A_19_P00808758	0.0106313	3.53628	3.53628	up	6.90858	6.69011	7.44671	P	P	P	4.98691	4.72763	5.7629	P	P	P	A_19_P00808758	---	TGGTTCCATTTCATACATGTTTGGAAAATAATCTGCAGAAATGAGCTGTGCTTGCAAGGA	85103210	chr13	85103151	+	FALSE	---	---	---	---	---	---
A_32_P163089	0.0425823	3.46981	3.46981	up	4.74647	4.58333	4.78301	P	P	P	2.42426	2.29168	3.62245	A	A	A	A_32_P163089	C12orf75	TATGGTGTCCAGTCAAACAAAGACGGTTCGGAAAAATTAGAAGAAAATAACATCATGACT	105761274	chr12	105760440	+	FALSE	ENST00000548458	387882	NM_001145199	chromosome 12 open reading frame 75	---	THC2610817
A_33_P3358856	0.0321209	3.43582	3.43582	up	5.46804	5.39721	5.01502	P	P	P	4.21095	3.07944	2.92368	P	A	A	A_33_P3358856	---	GACGCACCCGCGGGACGTGCTTCTCCTGCCCGCGATGGTGGGTAGCACGGTGGGCGTCTA	1307493	chr19	1307434	-	FALSE	ENST00000494093	---	---	---	---	---
A_23_P45475	0.0273459	3.39746	3.39746	up	5.45069	4.40816	4.30719	P	P	P	3.55163	3.05457	2.29707	A	A	A	A_23_P45475	GLA	ATCACACAGCTCCTCCCTGTGAAAAGGAAGCTAGGGTTCTATGAATGGACTTCAAGGTTA	100652937	chrX	100652878	-	FALSE	ENST00000466414	2717	NM_000169	"galactosidase, alpha"	GO:0005515|GO:0006665|GO:0005794|GO:0009311|GO:0006687|GO:0046477|GO:0052692|GO:0046479|GO:0005102|GO:0016936|GO:0005576|GO:0016139|GO:0044281|GO:0003824|GO:0005764|GO:0042803|GO:0005737|GO:0051001|GO:0016787|GO:0045019|GO:0004557|GO:0070062|GO:0043202	THC2568094
A_23_P142146	0.028481	3.38046	3.38046	up	9.72886	8.89685	9.85662	P	P	P	7.74514	7.77334	7.86393	P	P	P	A_23_P142146	RPL18	TAACTGATGATGTGCGGGTTCAGGAGGTACCCAAACTGAAGGTATGTGCACTGCGCGTGA	49120023	chr19	49119441	-	FALSE	ENST00000549370	6141	NM_000979	ribosomal protein L18	GO:0010467|GO:0003735|GO:0019083|GO:0003723|GO:0006614|GO:0019058|GO:0005730|GO:0005634|GO:0006415|GO:0006412|GO:0006413|GO:0005829|GO:0006414|GO:0005737|GO:0016020|GO:0000184|GO:0016032|GO:0022625|GO:0044267|GO:0005925	THC2588277
A_32_P57728	0.0488326	3.35653	3.35653	up	4.0422	4.52699	3.58194	P	P	P	3.00867	2.3079	1.22943	A	A	A	A_32_P57728	PMS2P1	TGTATTCAGCTCTGTCAAGAATGGTCCAGGTTCTTCTAGATGATCTGCACAAATGGCTCC	99918653	chr7	99918594	-	FALSE	---	5379	NR_003613	postmeiotic segregation increased 2 pseudogene 1	GO:0016310|GO:0032300|GO:0016301|GO:0006298	THC2495768
A_24_P366415	0.0370234	3.3523	3.3523	up	7.76463	6.7825	8.23399	P	P	P	5.58612	5.61282	6.50059	P	P	P	A_24_P366415	---	ACACCATAATGGCACTGGTGGCAAGTCAATCTACGGGGAGAAAGTTGATGATGACAACTT	174350887	chr2	174350828	-	FALSE	ENST00000440938	---	---	---	---	---
A_24_P271527	0.0468797	3.32198	3.32198	up	5.1716	4.57116	5.01343	P	P	P	2.94299	3.92875	2.26579	A	P	A	A_24_P271527	JOSD1	AAACATTTCAGGGCTGGTTTCTCTGTTCATATCCAATTCTGGTGCTTAGGAACAGGGACC	39081879	chr22	39081820	-	FALSE	ENST00000216039	9929	NM_014876	Josephin domain containing 1	GO:0005737|GO:0016020|GO:0005886|GO:0006508|GO:0008242	THC2468398
A_19_P00807336	0.0370341	3.31858	3.31858	up	7.72211	6.30284	6.93154	P	P	P	5.77772	5.14536	5.08515	P	P	P	A_19_P00807336	PPA1	TAATGATATCAATGATGTCAAACAGCTGAAACCTGGCTACTTAGAAGCTACTGTGGACTG	71973223	chr10	71969387	-	FALSE	ENST00000393779	5464	NM_021129	pyrophosphatase (inorganic) 1	GO:0010467|GO:0005737|GO:0000287|GO:0004427|GO:0071344|GO:0006796|GO:0070062|GO:0006418|GO:0005829	THC2577499
A_23_P135084	0.00135437	3.2986	3.2986	up	10.9112	11.1076	11.4521	P	P	P	9.24779	9.72206	9.34341	P	P	P	A_23_P135084	RPL7A	ACGTCTAGTCCACAGGAAGACCTGCACCACTGTCGCCTTCACACAGGTGAACTCGGAAGA	136217862	chr9	136217529	+	FALSE	ENST00000588490	6130	NM_000972	ribosomal protein L7a	GO:0005515|GO:0010467|GO:0003735|GO:0042254|GO:0019083|GO:0003723|GO:0006614|GO:0019058|GO:0005634|GO:0006415|GO:0006412|GO:0006413|GO:0005829|GO:0006414|GO:0016020|GO:0000184|GO:0042788|GO:0016032|GO:0022625|GO:0044267|GO:0005925|GO:0070062	THC2560213
A_33_P3220612	0.0476586	3.2837	3.2837	up	5.02854	4.99958	6.3478	P	P	P	3.08852	4.34339	3.97083	A	P	A	A_33_P3220612	FAM89B	ATTGGGATGAGTGCCTGGCTCCCATCTCCTCCTCACCTTTTGTTGCTATCGGCAGCTGCT	65341494	chr11	65341435	+	FALSE	ENST00000449319	23625	NM_001098784	"family with sequence similarity 89, member B"	GO:0001222|GO:0005737|GO:0009986|GO:0060392|GO:0030512	THC2494467
A_24_P305678	7.72443e-07	3.2738	3.2738	up	4.95195	4.92393	4.87232	P	P	P	3.22928	3.22263	3.16362	A	A	A	A_24_P305678	PITPNB	CTGGGCACTGTTGTAAGATAGGTTTTGTCAGAGCATAATCATTGTCTGCAAAGTGTTTGG	28247999	chr22	28247940	-	FALSE	ENST00000320996	23760	NM_012399	"phosphatidylinositol transfer protein, beta"	GO:0006629|GO:0015914|GO:0000139|GO:0005789|GO:0044281|GO:0006644|GO:0001701|GO:0070062|GO:0046474|GO:0008289	THC2493120
A_32_P193288	0.0464085	3.25791	3.25791	up	10.0299	8.85798	10.2241	P	P	P	8.40389	8.10713	7.7549	P	P	P	A_32_P193288	RPL18A	GTCGCCAAGTCCCGCTTCTGGTACTTCGTATCTCAGTTAAAGAAGATGAAGAAGTCTTCA	17972257	chr19	17972198	+	FALSE	ENST00000456046	6142	NM_000980	ribosomal protein L18a	GO:0010467|GO:0003735|GO:0019083|GO:0003723|GO:0006614|GO:0019058|GO:0006415|GO:0006412|GO:0006413|GO:0005829|GO:0006414|GO:0000184|GO:0016020|GO:0016032|GO:0022625|GO:0044267	THC2581327
A_33_P3271241	0.0216309	3.24785	3.24785	up	8.28638	7.08921	7.59065	P	P	P	6.46306	5.81133	5.72865	P	P	P	A_33_P3271241	PPA1	GCATATTGGCTATGATTGACGAAGGGGAAACCGACTGGAAAGTCATTGCCATTAATGTGG	71973305	chr10	71973246	-	FALSE	ENST00000373230	5464	NM_021129	pyrophosphatase (inorganic) 1	GO:0010467|GO:0005737|GO:0000287|GO:0004427|GO:0071344|GO:0006796|GO:0070062|GO:0006418|GO:0005829	THC2547886
A_33_P3258362	0.00519696	3.23435	3.23435	up	6.4093	6.98495	6.52918	P	P	P	5.15478	5.17698	4.47236	P	P	P	A_33_P3258362	HBA2	TTCCTGGCTTCTGTGAGCACCGTGCTGACCTCCAAATACCGTTAAGCTGGAGCCTCGGTA	223614	chr16	223555	+	FALSE	ENST00000482565	3040	NM_000517	"hemoglobin, alpha 2"	GO:0005515|GO:0042542|GO:0072562|GO:0044281|GO:0051291|GO:0005829|GO:0031838|GO:0004601|GO:0071682|GO:0042744|GO:0010942|GO:0031720|GO:0070062|GO:0005833|GO:0005506|GO:0005576|GO:0006898|GO:0015671|GO:0019825|GO:0016020|GO:0022627|GO:0005344|GO:0015701|GO:0020037|GO:0055114	THC2564653
A_23_P83192	0.0303464	3.21335	3.21335	up	6.45957	5.69776	6.30866	P	P	P	4.73722	3.59291	4.88125	P	A	P	A_23_P83192	PHPT1	TGGTCCTGCCCAGCACGCCATTTCAACTGAGAAAATCAAAGCCAAGTACCCCGACTACGA	139745271	chr9	139745212	+	FALSE	ENST00000492540	29085	NM_014172	phosphohistidine phosphatase 1	GO:0051350|GO:0008969|GO:0035774|GO:0050860|GO:2000147|GO:0005829|GO:0044325|GO:2000249|GO:0035971|GO:2000984|GO:0006470|GO:0019855|GO:0004721|GO:0070062	THC2559032
A_24_P194962	0.0201311	3.1999	3.1999	up	8.13119	8.1652	8.17211	P	P	P	5.94167	6.72074	6.65147	P	P	P	A_24_P194962	---	GGGGTCCCTTACTCCATTATCAAGGGGAAGGCAAGACTGGGCCATCTAGTCCACAGGAAG	88390851	chr10	88390792	-	FALSE	ENST00000481963	---	---	---	---	---
A_21_P0011491	0.0373932	3.17566	3.17566	up	12.0833	10.8841	11.5962	P	P	P	9.75927	9.95602	10.0723	P	P	P	A_21_P0011491	XLOC_l2_005557	GGCCAGCTGAGGCTACAAAAACTAACCCTGGATCCTACTCTCTTATTAAAATGATTTTGG	76268977	chr16	76268918	-	FALSE	---	---	---	---	---	---
A_23_P106481	0.0347075	3.17458	3.17458	up	5.38329	5.01455	5.09044	P	P	P	3.74103	3.84299	2.66472	A	A	A	A_23_P106481	EMC4	TCTTCAGGGTTTGGTCTATCTCATTGGGAACCTGATGGGTTTGGCATTGGCTGTTTACAA	34520723	chr15	34520664	+	FALSE	ENST00000560911	51234	NM_016454	ER membrane protein complex subunit 4	GO:0072546|GO:0006915|GO:0016021	THC2524496
A_23_P26457	0.00107402	3.15787	3.15787	up	6.33445	6.82417	6.56765	P	P	P	4.98184	5.06408	4.72365	P	P	P	A_23_P26457	HBA2	GGCTTCTGTGAGCACCGTGCTGACCTCCAAATACCGTTAAGCTGGAGCCTCGGTAGCCGT	223619	chr16	223560	+	FALSE	ENST00000482565	3040	NM_000517	"hemoglobin, alpha 2"	GO:0005515|GO:0042542|GO:0072562|GO:0044281|GO:0051291|GO:0005829|GO:0031838|GO:0004601|GO:0071682|GO:0042744|GO:0010942|GO:0031720|GO:0070062|GO:0005833|GO:0005506|GO:0005576|GO:0006898|GO:0015671|GO:0019825|GO:0016020|GO:0022627|GO:0005344|GO:0015701|GO:0020037|GO:0055114	THC2564653
A_23_P3532	0.0494466	3.14751	3.14751	up	5.42257	4.932	5.63535	P	P	P	3.67291	2.66933	4.32207	A	A	P	A_23_P3532	LITAF	GACATATCCACAAGGTCGTAAATGCATGCTAGAAAAATAGGGCTGGATCTTATCACTGCC	11642876	chr16	11642817	-	FALSE	ENST00000381810	9516	NM_004862	lipopolysaccharide-induced TNF factor	GO:0005515|GO:0042347|GO:0005794|GO:0005886|GO:0006357|GO:0050699|GO:0007568|GO:0006915|GO:0005765|GO:0001817|GO:0006351|GO:0043231|GO:0007165|GO:0005737|GO:0071222|GO:0005654|GO:0004871|GO:0043123	THC2579980
A_24_P383330	0.00291028	3.12341	3.12341	up	7.16057	7.78957	7.61844	P	P	P	5.5754	5.99486	6.08963	P	P	P	A_24_P383330	---	GGACAGGACATCCAACCCAAAAGAGACCTCGCCCACCTTGTGAAACGGCCCTGCTATATC	189271055	chr4	189270996	-	FALSE	ENST00000494861	---	---	---	---	---
A_19_P00800549	0.0488413	3.11102	3.11102	up	4.88701	4.42399	5.83522	P	P	P	2.91086	4.22884	3.08607	A	P	A	A_19_P00800549	PMF1	CCCAGGGGCCTTTACCATGTTCTCCCCACATCCGTAAATAAACTTCCTCCGCTACACTGT	156209831	chr1	156209772	+	FALSE	ENST00000368279	11243	NM_001199654	polyamine-modulated factor 1	GO:0005515|GO:0005667|GO:0006355|GO:0006366|GO:0003713|GO:0005634|GO:0005829|GO:0043522|GO:0007067|GO:0007059|GO:0000444|GO:0000278|GO:0051301	THC2466155
A_23_P63798	0.00534222	3.10514	3.10514	up	4.81706	4.70726	5.41719	P	P	P	3.62245	3.45093	3.00018	A	A	A	A_23_P63798	KLF6	GGTTGGGTTGATTGTATGTTGAGGATCTATTACTGACCGTATGATGAGGCCAACTTTTTT	3821446	chr10	3821387	-	FALSE	ENST00000173785	1316	NM_001300	Kruppel-like factor 6	GO:0005737|GO:0030183|GO:0019221|GO:0005634|GO:0045893|GO:0003677|GO:0046872|GO:0006351	THC2469498
A_24_P179351	0.0355983	3.09785	3.09785	up	11.9426	11.8262	11.583	P	P	P	10.7131	9.42408	10.0601	P	P	P	A_24_P179351	TPT1	GAACAGAGACCAGAAAGAGTAAAACCTTTTATGACAGGGGCTGCAGAACAAATCAAGCAC	45913718	chr13	45913659	-	FALSE	ENST00000484604	7178	NM_003295	"tumor protein, translationally-controlled 1"	GO:0005515|GO:0045298|GO:0043066|GO:0005771|GO:0005509|GO:0006874|GO:0005634|GO:0042981|GO:0009615|GO:0005615|GO:0005737|GO:0006816|GO:0070062	THC2566859
A_33_P3303136	0.00773773	3.09556	3.09556	up	5.76972	5.72607	6.48118	P	P	P	4.77333	4.25509	4.09945	P	P	A	A_33_P3303136	SERPINB6	TTCATCCAGCACAGCAAGACCAACGGGATTCTCTTCTGCGGCCGCTTTTCCTCTCCGTGA	2948591	chr6	2948532	-	FALSE	ENST00000616722	5269	NM_001195291	"serpin peptidase inhibitor, clade B (ovalbumin), member 6"	GO:0010951|GO:0043234|GO:0005737|GO:0004867|GO:0002020|GO:0005615|GO:0070062|GO:0005829	THC2568153
A_24_P67308	0.00926018	3.09337	3.09337	up	9.27346	10.0631	9.92768	P	P	P	8.30754	7.87984	8.26855	P	P	P	A_24_P67308	RPL19P12	AAAGATGGGCTGATCATCCGCAAGCCTGTGGGTCCATTCCCCCGCTTGATGCCGGAAAAA	102781746	chr7	102781717	-	FALSE	ENST00000432746	100129424	NR_026660	ribosomal protein L19 pseudogene 12	---	---
A_33_P3379199	0.0426614	3.08602	3.08602	up	6.45215	7.17369	5.73724	P	P	P	5.36995	4.86425	4.45689	P	P	P	A_33_P3379199	UQCR10	TTCTTCGAGCGCGCCTTCGATCAAGGCGCGGACGCTATCTACGACCACATCAACGAGGGG	30163537	chr22	30163478	+	FALSE	ENST00000401406	29796	NM_013387	"ubiquinol-cytochrome c reductase, complex III subunit X"	GO:0022904|GO:0008121|GO:0006122|GO:0005743|GO:0005750|GO:0044281|GO:0044237|GO:0070062	THC2466513
A_23_P112251	0.0431358	3.06883	3.06883	up	9.14709	7.7087	8.46362	P	P	P	7.48001	6.40697	6.70822	P	P	P	A_23_P112251	GNG10	AGAATTCTTAACTTCACAAGTGTTTTACTTCGACGATGTGCCTTTGATTTAATTTGGGAC	114432429	chr9	114432370	+	FALSE	ENST00000374294	2790	NM_001017998	"guanine nucleotide binding protein (G protein), gamma 10"	GO:0007165|GO:0006112|GO:0007186|GO:0005886|GO:0071377|GO:0005834|GO:0003924|GO:0007268|GO:0044281|GO:0004871|GO:0070062	THC2467906
A_24_P375683	0.00829789	3.02234	3.02234	up	5.1671	5.86203	5.36149	P	P	P	3.71478	3.9756	3.98855	A	A	A	A_24_P375683	---	AGGAGGCTAAGAAAGTGGTGAATCCCTTTGTGAAAAGGCCTAAGAATTTTGGCACTGGAC	121213081	chr3	121213021	+	FALSE	ENST00000486538	---	---	---	---	---
A_23_P123563	0.0335796	2.96634	2.96634	up	12.4013	11.8182	13.0071	P	P	P	10.8255	11.1866	10.7063	P	P	P	A_23_P123563	RPS6	GAACAAATTGCGAAGAGACGCAGACTTTCCTCTCTGCGAGCTTCTACTTCTAAGTCTGAA	19376365	chr9	19376306	-	FALSE	ENST00000315377	6194	NM_001010	ribosomal protein S6	GO:0005515|GO:0008286|GO:0010467|GO:0048471|GO:0007093|GO:0007369|GO:0006364|GO:0019058|GO:0015935|GO:0005634|GO:0006412|GO:0006924|GO:0030425|GO:0006413|GO:0005829|GO:0006414|GO:0005737|GO:0000082|GO:0002309|GO:0000184|GO:0048821|GO:0022605|GO:0016032|GO:0042274|GO:0000028|GO:0031929|GO:0043066|GO:0033077|GO:0043065|GO:0003735|GO:0019901|GO:0019083|GO:0006614|GO:0005730|GO:0042593|GO:0001890|GO:…	THC2508881
A_23_P120942	0.0498443	2.96147	2.96147	up	8.35558	7.7565	9.2005	P	P	P	6.45167	7.16416	7.24159	P	P	P	A_23_P120942	XRCC6	TTTATGTTTTTGAGGCTTTCTGTTGCCATGGTGATGGTGTAGCCCTCCCACTTTGCTGTT	42060001	chr22	42059942	+	FALSE	ENST00000359308	2547	NM_001469	X-ray repair complementing defective repair in Chinese hamster cells 6	GO:0005515|GO:0044212|GO:0071481|GO:0005634|GO:0006303|GO:0005829|GO:0006302|GO:0003691|GO:0004003|GO:0003690|GO:0000723|GO:0050769|GO:0045944|GO:0016032|GO:0032481|GO:0032508|GO:0000783|GO:0005667|GO:0071475|GO:0033151|GO:0005730|GO:0008022|GO:0005524|GO:0003677|GO:0006351|GO:0070419|GO:0051575|GO:0003684|GO:0043564|GO:0006281|GO:0016020|GO:0007420|GO:0045087|GO:0005654|GO:0045893|GO:0045892|GO:…	THC2492168
A_23_P87616	0.0492523	2.95102	2.95102	up	8.31259	7.8417	9.2434	P	P	P	6.29859	7.06191	7.48001	P	P	P	A_23_P87616	ATP5G2	TGTCTGATGGTAGCCTTTCTCATCCTCTTTGCCATGTGAAGGAGCCGTCTCCACCTCCCA	54059136	chr12	54059077	-	FALSE	ENST00000549164	517	NM_001002031	"ATP synthase, H+ transporting, mitochondrial Fo complex, subunit C2 (subunit 9)"	GO:0005215|GO:0015078|GO:0045471|GO:0005741|GO:0044281|GO:0005753|GO:0008289|GO:0022904|GO:0042776|GO:0015991|GO:0016021|GO:0044237|GO:0045263	THC2494345
A_23_P11995	0.00723619	2.9439	2.9439	up	8.90791	8.22235	8.92213	P	P	P	7.49407	6.9181	7.00206	P	P	P	A_23_P11995	PRDX1	TCAGGATTATGGGGTCTTAAAGGCTGATGAAGGCATCTCGTTCAGGGGCCTTTTTATCAT	45980589	chr1	45980295	-	FALSE	ENST00000424390	5052	NM_002574	peroxiredoxin 1	GO:0005515|GO:0042345|GO:0005782|GO:0008283|GO:0042267|GO:0034101|GO:0005634|GO:0032872|GO:0005615|GO:0042803|GO:0005829|GO:0005737|GO:0004601|GO:0001895|GO:0005759|GO:0019430|GO:0042744|GO:0070062|GO:0042470|GO:0005719|GO:0005730|GO:0008379|GO:0001501|GO:0000302|GO:0020037|GO:0055114	THC2561433
A_24_P225010	0.00118946	2.93611	2.93611	up	10.3778	9.95098	10.158	P	P	P	8.51384	8.57577	8.75593	P	P	P	A_24_P225010	RPS15	GTCTACAACGGCAAGACCTTCAACCAGGTGGAGATCAAGCCCGAGATGATCGGCCACTAC	1440368	chr19	1440214	+	FALSE	ENST00000433675	6209	NM_001018	ribosomal protein S15	GO:0005515|GO:0010467|GO:0006364|GO:0019058|GO:0005634|GO:0006412|GO:0006413|GO:0005829|GO:0006414|GO:0005737|GO:0000184|GO:0016032|GO:0042274|GO:0000028|GO:0003735|GO:0006614|GO:0019083|GO:0006415|GO:0003677|GO:0001649|GO:0016020|GO:0022627|GO:0005654|GO:0044267|GO:0005925|GO:0000056	THC2518505
A_24_P754803	0.0392879	2.93117	2.93117	up	10.6432	10.0848	11.416	P	P	P	9.2945	8.70493	9.64941	P	P	P	A_24_P754803	---	ATTGGCCAAGTTATCATGTCCATCCGCACCAAGCTGCAGAACAAGGAGCATGTGATTGAG	153628925	chrX	153628866	+	FALSE	ENST00000436473	---	CR542069	---	---	THC2509207
A_33_P3282836	0.0091982	2.9212	2.9212	up	12.3336	11.6656	12.0035	P	P	P	10.9283	10.2685	10.1064	P	P	P	A_33_P3282836	RPS28	TTTTGTCCGCCACACGTAACTGAGATGCTCCTTTAAATAAAGCGTTTGTGTTTCAAGTTA	8387279	chr19	8387220	+	FALSE	ENST00000417088	6234	NM_001031	ribosomal protein S28	GO:0010467|GO:0003735|GO:0019083|GO:0006364|GO:0006614|GO:0019058|GO:0015935|GO:0006415|GO:0006412|GO:0006413|GO:0005829|GO:0006414|GO:0005737|GO:0000184|GO:0022627|GO:0016032|GO:0042274|GO:0044267|GO:0070062	THC2555197
A_33_P3329949	0.049783	2.8683	2.8683	up	5.89526	5.80107	7.05972	P	P	P	5.25529	4.17224	4.92969	P	P	P	A_33_P3329949	ANXA7	CCGTATCAGGGTAATGTGCTTGGTTTGCACATGTTGTTATTGCCTTAATTCTAATTTTAT	75135734	chr10	75135675	-	FALSE	ENST00000463788	310	NM_004034	annexin A7	GO:0005515|GO:0014070|GO:0009651|GO:0005886|GO:0008283|GO:0008360|GO:0009992|GO:0005634|GO:0005635|GO:0005829|GO:0005544|GO:0030855|GO:0061025|GO:0070062|GO:0005509|GO:0006914|GO:0006874|GO:0007599|GO:0051592|GO:0005178|GO:0016020|GO:0042584|GO:0010629|GO:0035176|GO:0005789|GO:0048306	THC2788823
A_23_P119130	0.00282023	2.85653	2.85653	up	10.9998	10.5826	10.4562	P	P	P	9.31535	8.96713	9.24779	P	P	P	A_23_P119130	RPS19	AGACGTGAACCAGCAGGAGTTCGTCAGAGCTCTGGCAGCCTTCCTCAAAAAGTCCGGGAA	42365189	chr19	42364865	+	FALSE	ENST00000600467	6223	NM_001022	ribosomal protein S19	GO:0005515|GO:0000462|GO:0010467|GO:0006364|GO:0009991|GO:0019058|GO:0060266|GO:0006412|GO:0042803|GO:0006413|GO:0060265|GO:0005829|GO:0006414|GO:0030490|GO:0005737|GO:0000184|GO:0016032|GO:0042274|GO:0070062|GO:0000028|GO:0051262|GO:0003735|GO:0019901|GO:0017134|GO:0006614|GO:0019083|GO:0005730|GO:0006415|GO:0002548|GO:0007000|GO:0016020|GO:0022627|GO:0030218|GO:0005840|GO:0051272|GO:0044267|GO:…	THC2565101
A_23_P355385	0.0464116	2.85279	2.85279	up	5.12786	4.24704	5.55967	P	P	P	3.0833	3.1219	4.19102	A	A	A	A_23_P355385	PPP6C	TAAGAAATTTCAGCAGCAAAGTTGTTATTCAGTGGGCACGATGGACTCCAAATGCCTCAA	127911554	chr9	127911495	-	FALSE	ENST00000451402	5537	NM_002721	"protein phosphatase 6, catalytic subunit"	GO:0005515|GO:0000082|GO:0006470|GO:0004722|GO:0046872|GO:0005829	THC2466331
A_21_P0000714	0.00752944	2.83482	2.83482	up	5.78544	5.32904	6.08582	P	P	P	4.00318	4.24597	4.49742	A	P	P	A_21_P0000714	SNHG16	TGCTGTGTGATAACTTGTTTGGATGAGACTTAACTTAAAACCACTTACAATAAACTTGGG	74561418	chr17	74561359	+	FALSE	ENST00000493536	100507246	NR_038108	small nucleolar RNA host gene 16 (non-protein coding)	---	THC2492327
A_23_P139575	0.00830471	2.82413	2.82413	up	9.10555	8.51982	9.1824	P	P	P	7.30455	7.11518	7.87055	P	P	P	A_23_P139575	PRR13	GGTTTTGGAACCTTACCTCTCCTCCTTAGCCCAATATGCTGTCTTGGGTCCTATTCAAAT	53840400	chr12	53840341	+	FALSE	ENST00000429243	54458	NM_001005354	proline rich 13	GO:0006355|GO:0005634|GO:0006351	THC2469385
A_33_P3771039	0.00436083	2.81558	2.81558	up	7.88366	7.27383	7.5848	P	P	P	5.84713	5.95121	6.45268	P	P	P	A_33_P3771039	---	TAACAGATGACGTGTGGGTTCAGGAGGTGCCCAAACTGAAGGTGTGTGCACTGGGCGTGA	121081198	chr7	121081139	-	FALSE	ENST00000416734	---	---	---	---	---
A_23_P208540	0.0281411	2.80161	2.80161	up	7.4284	6.47119	6.9904	P	P	P	5.37646	5.5821	5.61738	P	P	P	A_23_P208540	NDUFA3	GCCCCCATTGAGCCCCTACTTCAAGTACTCCGTCATGATCAACAAGGCCACGCCCTACAA	54609310	chr19	54609251	+	FALSE	ENST00000484103	4696	NM_004542	"NADH dehydrogenase (ubiquinone) 1 alpha subcomplex, 3, 9kDa"	GO:0022904|GO:0005739|GO:0005747|GO:0006120|GO:0005743|GO:0044281|GO:0016021|GO:0008137|GO:0044237	THC2490320
A_24_P134074	0.00216801	2.75314	2.75314	up	11.537	11.2939	11.0782	P	P	P	9.97464	9.72886	9.84853	P	P	P	A_24_P134074	RPS19	AGCACAAAGAGCTTGCTCCCTACGATGAGAACTGGTTCTACACGCGAGCTGCTTCCACAG	42373109	chr19	42365231	+	FALSE	ENST00000600467	6223	NM_001022	ribosomal protein S19	GO:0005515|GO:0000462|GO:0010467|GO:0006364|GO:0009991|GO:0019058|GO:0060266|GO:0006412|GO:0042803|GO:0006413|GO:0060265|GO:0005829|GO:0006414|GO:0030490|GO:0005737|GO:0000184|GO:0016032|GO:0042274|GO:0070062|GO:0000028|GO:0051262|GO:0003735|GO:0019901|GO:0017134|GO:0006614|GO:0019083|GO:0005730|GO:0006415|GO:0002548|GO:0007000|GO:0016020|GO:0022627|GO:0030218|GO:0005840|GO:0051272|GO:0044267|GO:…	THC2548810
A_24_P42014	0.00777208	2.75139	2.75139	up	9.53645	9.55715	10.1749	P	P	P	8.09416	8.51769	8.34013	P	P	P	A_24_P42014	---	TATCAGGACCAATTATGATGACAGATACGATGAGATCCACTGTCACTGGGGAGGCAATGT	10119406	chr6	10119347	+	FALSE	ENST00000401715	---	---	---	---	---
A_24_P306726	0.041468	2.74597	2.74597	up	10.6965	10.9622	10.5772	P	P	P	9.79893	8.547	9.28174	P	P	P	A_24_P306726	TPT1	GACCAGAAACAGTAAAACCTTTTATGACAGGGGCTGCAAAACAAATCAAGGACATCCTTG	45913711	chr13	45913652	-	FALSE	ENST00000403538	7178	NM_003295	"tumor protein, translationally-controlled 1"	GO:0005515|GO:0045298|GO:0043066|GO:0005771|GO:0005509|GO:0006874|GO:0005634|GO:0042981|GO:0009615|GO:0005615|GO:0005737|GO:0006816|GO:0070062	THC2566859
A_24_P280926	0.0471588	2.73954	2.73954	up	6.88876	5.76665	6.9181	P	P	P	5.49566	5.08094	4.82311	P	P	P	A_24_P280926	---	AGGTCCGTATCTGCCCTGTGGAGTTCAACCCCCAATTTATGTGGCATCATACGTGGCACG	26251396	chr2	26251337	-	FALSE	---	---	---	---	---	---
A_33_P3303687	0.0120636	2.73912	2.73912	up	4.39735	4.47889	3.71568	P	P	P	2.98327	2.82449	2.49554	A	A	A	A_33_P3303687	PSMC1	TCTAAAGAAAATGTTCTTTATAAGAAACAGGAAGGCACCCCTGAGAGGCTCTATCTCTAG	90738750	chr14	90738692	+	FALSE	ENST00000405257	5700	NM_002802	"proteasome (prosome, macropain) 26S subunit, ATPase, 1"	GO:0005515|GO:0002474|GO:0010467|GO:0030054|GO:0090263|GO:0005634|GO:0044281|GO:0031145|GO:0005829|GO:0034641|GO:0005737|GO:0000082|GO:0016032|GO:0090090|GO:0016887|GO:0006977|GO:0000209|GO:0043066|GO:0000502|GO:0005838|GO:0006521|GO:0051437|GO:0042590|GO:0006915|GO:0042981|GO:0051436|GO:0005524|GO:0051439|GO:0016020|GO:0002479|GO:0017025|GO:0005654|GO:0022624|GO:0000278	THC2568941
A_23_P15705	0.0397117	2.73711	2.73711	up	7.16416	6.33735	7.578	P	P	P	6.0214	5.18029	5.65922	P	P	P	A_23_P15705	PSMB6	GGGAAGGCATGACCAAGGAAGAGTGTCTGCAATTCACTGCCAATGCTCTCGCTTTGGCCA	4701589	chr17	4701404	+	FALSE	ENST00000571309	5694	NM_002798	"proteasome (prosome, macropain) subunit, beta type, 6"	GO:0002474|GO:0010467|GO:0090263|GO:0005634|GO:0044281|GO:0031145|GO:0005829|GO:0004298|GO:0034641|GO:0005737|GO:0000082|GO:0016032|GO:0090090|GO:0070062|GO:0006977|GO:0000209|GO:0000502|GO:0005839|GO:0043066|GO:0005794|GO:0006521|GO:0051437|GO:0042590|GO:0006915|GO:0042981|GO:0051436|GO:0051439|GO:0004175|GO:0002479|GO:0005654|GO:0000278	THC2705405
A_23_P111843	0.0444037	2.71689	2.71689	up	7.94477	6.87227	7.92124	P	P	P	6.49236	6.0804	6.02962	P	P	P	A_23_P111843	ZNHIT1	AGGGAGGAGCCGCTCATTCACCCAACAAAACTGTGTCTTATCTGCCAGGAAAGACCAGCC	100867398	chr7	100867339	+	FALSE	ENST00000485387	10467	NM_006349	"zinc finger, HIT-type containing 1"	GO:0005515|GO:0043486|GO:0042826|GO:0031063|GO:0042129|GO:0031491|GO:0005634|GO:0070317|GO:0000122|GO:0000812|GO:0046872	THC2492130
A_23_P217068	0.0153716	2.68375	2.68375	up	12.4793	12.0833	12.6049	P	P	P	11.3804	10.4562	10.9622	P	P	P	A_23_P217068	RPL12	GATGACATCAACAGTGGTGCTGTGGAATGCCCAGCCAGTTAAGCACAAAGGAAAACATTT	130210191	chr9	130209982	-	FALSE	ENST00000536368	6136	NM_000976	ribosomal protein L12	GO:0005515|GO:0010467|GO:0003735|GO:0019083|GO:0006614|GO:0019058|GO:0006415|GO:0006412|GO:0006413|GO:0005829|GO:0006414|GO:0000184|GO:0016020|GO:0016032|GO:0022625|GO:0044267|GO:0005925|GO:0070062	NP1154003
A_23_P85560	0.0369983	2.67855	2.67855	up	5.94987	5.30441	6.51219	P	P	P	4.22127	4.3708	5.02533	P	P	P	A_23_P85560	EIF3I	TATCCATTACTTCGACCCACAGTACTTCGAATTTGAGTTTGAGGCTTAAGAAGCTGGATC	32696808	chr1	32696749	+	FALSE	ENST00000373586	8668	NM_003757	"eukaryotic translation initiation factor 3, subunit I"	GO:0005515|GO:0010467|GO:0005852|GO:0016282|GO:0033290|GO:0001731|GO:0003743|GO:0006412|GO:0006413|GO:0005829|GO:0071541|GO:0006446|GO:0044267|GO:0070062	NP082180
A_23_P148513	0.0244907	2.6706	2.6706	up	6.85382	6.58915	6.69221	P	P	P	5.67588	4.75882	5.31787	P	P	P	A_23_P148513	GNG5	GTAAAAGTTTCCCAGGCAGCTGCAGACTTGAAACAGTTCTGTCTGCAGAATGCTCAACAT	84971699	chr1	84967600	-	FALSE	ENST00000370641	2787	NM_005274	"guanine nucleotide binding protein (G protein), gamma 5"	GO:0005886|GO:0005834|GO:0003924|GO:0007268|GO:0044281|GO:0030165|GO:0007165|GO:0006112|GO:0007186|GO:0016020|GO:0071377|GO:0004871|GO:0070062	THC2477829
A_23_P68866	0.0199193	2.66825	2.66825	up	9.2232	9.36872	8.4839	P	P	P	7.94175	7.4729	7.51107	P	P	P	A_23_P68866	UQCR10	CTGTTGGCAAGAAACGGCTTTACTTACAAAACAGACTCTTTACCTTCTGCTGTGTTTGAA	30165886	chr22	30165827	+	FALSE	ENST00000401406	29796	NM_001003684	"ubiquinol-cytochrome c reductase, complex III subunit X"	GO:0022904|GO:0008121|GO:0006122|GO:0005743|GO:0005750|GO:0044281|GO:0044237|GO:0070062	THC2466513
A_24_P928604	0.0269044	2.66321	2.66321	up	8.63806	7.82177	8.69612	P	P	P	7.52185	6.88247	6.46784	P	P	P	A_24_P928604	---	TCTACCACATGCAAATCTTTGCGCCTAATCATGTAGTCGCCAAGTTCCACTTCTGGTACT	33445684	chr1	33445625	+	FALSE	ENST00000401937	---	---	---	---	---
A_33_P3377199	0.0230671	2.6632	2.6632	up	9.97464	9.27346	10.2622	P	P	P	8.80547	8.36432	8.20144	P	P	P	A_33_P3377199	PRDX1	CAGGCTACTGGTTTGTATGATGTATTAGTAGAGCAACCCATTAATCTTTTGTAGTTTGTA	45976799	chr1	45976740	-	FALSE	ENST00000372079	5052	NM_002574	peroxiredoxin 1	GO:0005515|GO:0042345|GO:0005782|GO:0008283|GO:0042267|GO:0034101|GO:0005634|GO:0032872|GO:0005615|GO:0042803|GO:0005829|GO:0005737|GO:0004601|GO:0001895|GO:0005759|GO:0019430|GO:0042744|GO:0070062|GO:0042470|GO:0005719|GO:0005730|GO:0008379|GO:0001501|GO:0000302|GO:0020037|GO:0055114	THC2592224
A_19_P00325768	0.0192295	2.64704	2.64704	up	6.2418	5.89716	6.17831	P	P	P	5.08978	4.19336	4.70673	P	P	P	A_19_P00325768	---	CATTGTTTGAATCCTGTGGTTTCTTTCAGCCCACTTTTATTGACTTAACCTAGTTAATGT	24229445	chr19	24229386	-	FALSE	---	---	---	---	---	---
A_21_P0012112	0.0289466	2.64701	2.64701	up	12.1496	11.4553	11.3723	P	P	P	10.2849	10.2412	10.3674	P	P	P	A_21_P0012112	XLOC_l2_008560	ACGAGCCGGTGGCAGCTGCCAACAAGAAGCATTGGAACAAACCATGCTGGGTTAATACAT	18485738	chr20	18485441	+	FALSE	---	---	---	---	---	---
A_23_P77779	0.00853993	2.64298	2.64298	up	12.4274	12.3435	12.4013	P	P	P	11.1479	10.6911	11.0867	P	P	P	A_23_P77779	RPL19	GGAGGAAGAGACCAAGAAATAAAACCTCCCACTTTGTCTGTACATACTGGCCTCTGTGAT	37360939	chr17	37360880	+	FALSE	ENST00000225430	6143	NM_000981	ribosomal protein L19	GO:0010467|GO:0003735|GO:0019083|GO:0003723|GO:0006614|GO:0019058|GO:0005730|GO:0006415|GO:0006412|GO:0006413|GO:0005829|GO:0006414|GO:0005737|GO:0016020|GO:0000184|GO:0016032|GO:0022625|GO:0044267|GO:0005925	THC2565463
A_23_P99614	0.00802384	2.63908	2.63908	up	5.79192	5.62532	6.29859	P	P	P	4.639	4.2899	4.64664	P	P	P	A_23_P99614	BTBD6	ATCTTCCTGCTACCCTCTTGGATTCTAAGTGGTTCCAAGCTTAACTTGAGACCTTCCCTT	105717361	chr14	105717302	+	FALSE	ENST00000536364	90135	NM_033271	BTB (POZ) domain containing 6	GO:0000932	THC2462718
A_23_P115922	0.0307637	2.58086	2.58086	up	6.6316	6.62631	7.54141	P	P	P	5.89225	5.33826	5.61557	P	P	P	A_23_P115922	EIF4EBP2	GTTGATGTCTCAGGAATAAGCTGGATCTCCAATGTTTTGGGGATGCTTTGAGTCTCAAAA	72183584	chr10	72183525	+	FALSE	ENST00000373218	1979	NM_004096	eukaryotic translation initiation factor 4E binding protein 2	GO:0008286|GO:0005515|GO:0019933|GO:0008190|GO:0045947|GO:0006412	THC2507090
A_33_P3335451	0.0450071	2.55138	2.55138	up	6.43079	5.51013	6.54357	P	P	P	5.07115	4.88309	4.65026	P	P	A	A_33_P3335451	PARL	CCCCAGTCCGTGTCTTTTTAGAATGTGAATGATGATAAAGTTGTGAAATAAAGGTTTCTA	183547249	chr3	183547190	-	FALSE	ENST00000311101	55486	NM_018622	"presenilin associated, rhomboid-like"	GO:0005739|GO:0005515|GO:0090201|GO:0004252|GO:0004175|GO:0033619|GO:0006508|GO:0005743|GO:0005634|GO:2001243|GO:2000377|GO:0016021	THC2570323
A_23_P318646	0.0160421	2.54761	2.54761	up	9.50195	9.58	10.2054	P	P	P	8.5912	8.4671	8.27107	P	P	P	A_23_P318646	RPS10	CTTCACGTCATGAAGGCCATGCAGTCTCTCAAGTCCCGGGGCTGCGTGAAGGAACAGTTT	34392872	chr6	34392582	-	FALSE	ENST00000492704	6204	NM_001014	ribosomal protein S10	GO:0005515|GO:0010467|GO:0019083|GO:0006614|GO:0019058|GO:0005730|GO:0006415|GO:0006412|GO:0006413|GO:0005829|GO:0006414|GO:0005737|GO:0016020|GO:0000184|GO:0022627|GO:0016032|GO:0005840|GO:0044267|GO:0005925|GO:0070062	THC2523842
A_23_P147888	0.0406977	2.54688	2.54688	up	12.4222	11.567	12.6543	P	P	P	10.8378	11.2303	10.6836	P	P	P	A_23_P147888	RPLP2	ATTTGGCCTTTTTGATTAAATTCCTGCTCCCCTGCAAATAAAGCCTTTTTACACATCTAA	812877	chr11	812818	+	FALSE	ENST00000321153	6181	NM_001004	"ribosomal protein, large, P2"	GO:0010467|GO:0003735|GO:0019083|GO:0003723|GO:0006614|GO:0019058|GO:0006415|GO:0006412|GO:0006413|GO:0005829|GO:0006414|GO:0000184|GO:0016020|GO:0016032|GO:0022625|GO:0044267|GO:0005925|GO:0070062	THC2500756
A_33_P3221708	0.0217585	2.53649	2.53649	up	5.00245	5.84098	5.03068	P	P	P	4.15362	3.62099	4.17165	P	A	A	A_33_P3221708	XLOC_l2_012371	AATGTTCTTTATAAGAAACAGGAAGGCACCCCTGAGGGGCTCTATCTCTAGTGAACCACA	4704022	chr6	4703963	+	FALSE	---	---	---	---	---	---
A_33_P3320943	0.0295891	2.52292	2.52292	up	8.16005	7.41325	8.41743	P	P	P	6.50723	6.52918	7.05672	P	P	P	A_33_P3320943	---	TTTCACTTACGCTTTATCTTAACCACTGGACCATTCCTTCTGTAGCTCAGAGAGAGCACC	15410729	chr17	15410670	+	FALSE	---	---	---	---	GO:0005739|GO:0042277|GO:0006457|GO:0003755|GO:0016853|GO:0005615|GO:0005829	THC2525667
A_23_P254498	0.0159477	2.51771	2.51771	up	5.92587	5.11485	5.72704	P	P	P	4.67332	4.19223	3.9214	P	P	A	A_23_P254498	RANGRF	TTCTGTGAGGGGGAAAAGAGGTTGAAAAGAGGGTTTCCTCTTATTTCTTCCCTGTGCGTA	8193360	chr17	8193301	+	FALSE	ENST00000407006	29098	NM_016492	RAN guanine nucleotide release factor	GO:0005791|GO:0005886|GO:0005634|GO:2000649|GO:0044325|GO:0043547|GO:0005085|GO:0006888|GO:0005737|GO:0002027|GO:0014704|GO:0005901|GO:0042391|GO:0008536|GO:0008565|GO:2000010|GO:0032527|GO:0005654|GO:0003254|GO:0090004|GO:0017080	THC2485200
A_24_P135501	0.00637676	2.51543	2.51543	up	7.01941	7.63227	7.31901	P	P	P	5.64017	6.08275	6.25317	P	P	P	A_24_P135501	---	CTGGACCGCCAAACAGCGCTGCATAAGCTGGCCCACAAGTACAGACCAGAGACAAAGCAA	48022382	chr15	48022341	-	FALSE	ENST00000497325	---	---	---	---	THC2577892
A_23_P356484	0.0108461	2.48899	2.48899	up	12.2119	11.6512	12.1069	P	P	P	10.6588	10.8031	10.6139	P	P	P	A_23_P356484	RPS10	AGCCACCTCAGTAAAATTGGAGAGGATTCTTTTGCATTGAATAAACTTACAGCCAAAAAA	34385296	chr6	34385237	-	FALSE	ENST00000494077	6204	NM_001014	ribosomal protein S10	GO:0005515|GO:0010467|GO:0019083|GO:0006614|GO:0019058|GO:0005730|GO:0006415|GO:0006412|GO:0006413|GO:0005829|GO:0006414|GO:0005737|GO:0016020|GO:0000184|GO:0022627|GO:0016032|GO:0005840|GO:0044267|GO:0005925|GO:0070062	THC2594981
A_23_P143143	0.0255383	2.48273	2.48273	up	6.62364	5.86227	6.11652	P	P	P	5.05773	5.25638	4.29024	P	P	A	A_23_P143143	ID2	AGGCTTCTGAATTCCCTTCTGAGTTAATGTCAAATGACAGCAAAGCACTGTGTGGCTGAA	8823030	chr2	8822642	+	FALSE	ENST00000331129	3398	NM_002166	"inhibitor of DNA binding 2, dominant negative helix-loop-helix protein"	GO:0001656|GO:0005515|GO:0043353|GO:2000045|GO:0071158|GO:0048541|GO:0046983|GO:0000785|GO:0071285|GO:0005813|GO:2000178|GO:0007275|GO:0000122|GO:0045651|GO:0032922|GO:0071931|GO:0019216|GO:0043392|GO:0044325|GO:0043234|GO:0033598|GO:0045648|GO:0045600|GO:0005654|GO:0045893|GO:0045892|GO:0090398|GO:0045578|GO:0045475|GO:0003166|GO:0005634|GO:0045777|GO:0043433|GO:0005829|GO:0005737|GO:0021772|GO:…	THC2595217
A_23_P148194	0.00919225	2.48169	2.48169	up	5.57296	5.19063	5.00131	P	P	P	3.885	4.08689	3.91036	A	P	A	A_23_P148194	ADI1	GAACTAACACGCGCCTCGTAAAGGTCCCCAATGTAATGACTGAGCAGAAAATCAATCACT	3502720	chr2	3502661	-	FALSE	ENST00000327435	55256	NM_018269	acireductone dioxygenase 1	GO:0005515|GO:0005794|GO:0005506|GO:0005886|GO:0005634|GO:0044281|GO:0005829|GO:0034641|GO:0005737|GO:0000096|GO:0019509|GO:0006595|GO:0016491|GO:0005654|GO:0010309|GO:0055114	THC2588118
A_33_P3375668	0.0436979	2.42937	2.42937	up	11.8712	11.0162	11.7618	P	P	P	10.2988	10.3517	10.2966	P	P	P	A_33_P3375668	---	GCAACCGAATTCCAGTTTAGAGGCAAATTTGGTCGTGGACACCGTCAGCCACCTCAGTAG	24665373	chr22	24665314	-	FALSE	ENST00000396982	---	---	---	---	---
A_32_P14894	0.0277947	2.40867	2.40867	up	9.28174	9.2945	10.0755	P	P	P	8.49384	8.37558	8.10053	P	P	P	A_32_P14894	RPS10	CAAGAATGTGCCCAACCTTCATGTCATGAAAGCCATGCAGTCTCTCTAGTCCCGAGGCTA	34392888	chr6	34392598	-	FALSE	ENST00000408001	6204	NM_001014	ribosomal protein S10	GO:0005515|GO:0010467|GO:0019083|GO:0006614|GO:0019058|GO:0005730|GO:0006415|GO:0006412|GO:0006413|GO:0005829|GO:0006414|GO:0005737|GO:0016020|GO:0000184|GO:0022627|GO:0016032|GO:0005840|GO:0044267|GO:0005925|GO:0070062	THC2623999
A_33_P3221680	0.0344388	2.40645	2.40645	up	11.0405	11.0297	11.0405	P	P	P	10.1891	9.65741	9.33179	P	P	P	A_33_P3221680	RPS28	TCCGCCACACGGAATTGAGATGCTCCTTTAAATAAAGCGTTTGTGTTTCAAGTTAAAAAA	8387284	chr19	8387225	+	FALSE	---	6234	NM_001031	ribosomal protein S28	GO:0010467|GO:0003735|GO:0019083|GO:0006364|GO:0006614|GO:0019058|GO:0015935|GO:0006415|GO:0006412|GO:0006413|GO:0005829|GO:0006414|GO:0005737|GO:0000184|GO:0022627|GO:0016032|GO:0042274|GO:0044267|GO:0070062	THC2555197
A_33_P3300817	0.0293882	2.37999	2.37999	up	10.7699	10.3674	11.2939	P	P	P	9.84853	9.46195	9.48483	P	P	P	A_33_P3300817	RPS5	AGTCCAACCGCTGATTTTCCCAGCTGCTGCCCAATAAACCTGTCTGCCCTTTGGGGCAGT	58906163	chr19	58906104	+	FALSE	ENST00000599232	6193	NM_001009	ribosomal protein S5	GO:0010467|GO:0003735|GO:0019083|GO:0003723|GO:0006614|GO:0019058|GO:0003729|GO:0006415|GO:0006412|GO:0006413|GO:0005829|GO:0006414|GO:0016020|GO:0000184|GO:0022627|GO:0030529|GO:0016032|GO:0006450|GO:0044267|GO:0005925|GO:0070062	THC2556297
A_33_P3357669	0.0269396	2.36569	2.36569	up	7.33598	6.64358	7.459	P	P	P	6.42011	5.68205	5.58369	P	P	P	A_33_P3357669	---	ACATGCAAATCTTTGCGCCTAATCATTTGTCAACAAGTCCCACTTCTGGTACTTCGTATC	43527287	chr3	43527228	-	FALSE	ENST00000413663	---	---	---	---	---
A_23_P341325	0.0300812	2.35204	2.35204	up	8.65813	8.08042	9.03378	P	P	P	7.51468	6.90195	7.69501	P	P	P	A_23_P341325	RPL10L	CAGGGTACTGTAGCCCGGGTCCACATTGGTCAAGTCATCATGTCCATCCGCACCAAGCTT	47120573	chr14	47120514	-	FALSE	ENST00000298283	140801	NM_080746	ribosomal protein L10-like	GO:0003735|GO:0016020|GO:0005634|GO:0022625|GO:0007283|GO:0006412|GO:0005844	THC2475356
A_33_P3255782	0.00738834	2.34686	2.34686	up	9.03825	9.05795	9.59242	P	P	P	8.19692	8.06529	7.77334	P	P	P	A_33_P3255782	---	TCATGAAGGCCATGCAGTCTTCCAAGTCCCGGGGCTATGTGAAGGAACAGTTTGCTTGGA	133758721	chr5	133758662	+	FALSE	ENST00000471205	---	---	---	---	THC2600290
A_23_P36928	0.0172326	2.34645	2.34645	up	5.15728	4.6789	4.52228	P	P	P	3.50282	3.54066	3.69435	A	A	A	A_23_P36928	POLR1D	CCATCCTTCAGAGAGCAAAATTAATTTACGCATTCAGACTCGAGGTACCCTTCCAGCTGT	28197263	chr13	28197204	+	FALSE	ENST00000399696	51082	NM_015972	"polymerase (RNA) I polypeptide D, 16kDa"	GO:0010467|GO:0006386|GO:0006385|GO:0006363|GO:0006362|GO:0006361|GO:0006360|GO:0003677|GO:0006383|GO:0005829|GO:0001056|GO:0005736|GO:0045814|GO:0045087|GO:0001054|GO:0046983|GO:0040029|GO:0005666|GO:0032481|GO:0005654	THC2609441
A_24_P8768	0.0118813	2.34567	2.34567	up	7.25243	6.88346	7.33355	P	P	P	6.33445	5.67588	5.70819	P	P	P	A_24_P8768	MRPL20	AATTACAGCTGCTAGCCAGGAACATGGACTGAAGTATCCAGCGCTCATTGGGAATTTAGT	1341252	chr1	1341193	-	FALSE	ENST00000487659	55052	NM_017971	mitochondrial ribosomal protein L20	GO:0070124|GO:0005515|GO:0070125|GO:0070126|GO:0032543|GO:0006996|GO:0003735|GO:0005761|GO:0005743|GO:0019843	THC2572050
A_23_P154894	0.0164778	2.304	2.304	up	7.95622	8.4499	8.37733	P	P	P	6.97786	6.65888	7.46589	P	P	P	A_23_P154894	CSTB	AAAGCCAAGCATGATGAGCTGACCTATTTCTGATCCTGACTTTGGACAAGGCCCTTCAGC	45194115	chr21	45194056	-	FALSE	ENST00000291568	1476	NM_000100	cystatin B (stefin B)	GO:0010951|GO:0008344|GO:0005737|GO:0004869|GO:0004866|GO:0010466|GO:0005730|GO:0042981|GO:0002020|GO:0005615|GO:0070062|GO:0045861	THC2503761
A_23_P336854	0.0482191	2.29076	2.29076	up	10.1619	10.5235	10.8664	P	P	P	9.95098	8.82242	9.00859	P	P	P	A_23_P336854	---	ACAGTGGGAATATCACTTTTGATGAGATCGTCAACATTGCTCGACAGATGCGGCACCAAT	19804289	chr20	19804230	-	FALSE	ENST00000424633	---	---	---	---	---
A_23_P59397	0.0452272	2.28931	2.28931	up	3.45913	4.34798	3.9214	P	P	P	3.30159	2.56344	2.1848	A	A	A	A_23_P59397	RSPH3	ATCAGGTAATGATGTGCGAGTCCCCTCAGGTTATAGAAATTATGTTGTATTTAGTCAGTA	159398519	chr6	159398460	-	FALSE	ENST00000252655	83861	NM_031924	radial spoke 3 homolog (Chlamydomonas)	---	THC2473581
A_23_P340158	0.0112634	2.28629	2.28629	up	8.16693	7.56428	8.10886	P	P	P	7.01791	6.39338	6.85271	P	P	P	A_23_P340158	ISCU	GGGGGAAATTACCAGTAGAATGCCTTGGTCTGAATATTTGATAGAACCAATTGTTGTACA	108963086	chr12	108963027	+	FALSE	ENST00000545932	23479	NM_014301	iron-sulfur cluster assembly enzyme	GO:0005739|GO:0005515|GO:0009399|GO:0032947|GO:0005737|GO:0051536|GO:0016226|GO:0005506|GO:0005759|GO:0005634|GO:0044281|GO:0005829	THC2511033
A_23_P63067	0.0426021	2.26379	2.26379	up	7.73402	7.73847	8.4671	P	P	P	6.41535	7.40448	6.49068	P	P	P	A_23_P63067	DAP3	GACTGCAGTTGGCTCTGGACCTGCATTAAAATGGGTTTCACTGTGAATGCGTGACAATAA	155708216	chr1	155708157	+	FALSE	ENST00000471642	7818	NM_033657	death associated protein 3	GO:0005515|GO:0070124|GO:0070125|GO:0070126|GO:0006996|GO:0032543|GO:0005730|GO:0005743|GO:0005761|GO:0015935|GO:0005634|GO:0097190|GO:0005739|GO:0008637|GO:0005654	THC2469943
A_23_P251593	0.00179663	2.23289	2.23289	up	11.8792	11.6591	11.537	P	P	P	10.6471	10.4792	10.487	P	P	P	A_23_P251593	RPL10A	GCTGTCAACTTCTTGGTGTCATTGCTCAAGAAAAACTGGCAGAATGTCCGGGCCTTATAT	35438488	chr6	35438429	+	FALSE	ENST00000472730	4736	NM_007104	ribosomal protein L10a	GO:0005515|GO:0010467|GO:0003735|GO:0019083|GO:0006614|GO:0019058|GO:0005730|GO:0005634|GO:0006415|GO:0009653|GO:0006412|GO:0006413|GO:0005829|GO:0006414|GO:0005739|GO:0005737|GO:0016020|GO:0000184|GO:0016032|GO:0022625|GO:0044267|GO:0005925|GO:0070062	THC2504865
A_23_P49768	0.0325334	2.23134	2.23134	up	5.87694	5.96197	5.60158	P	P	P	4.92708	4.84027	4.08451	P	P	A	A_23_P49768	MRPL27	CAAGCCTGAGGGCACCTTCAAACTGGTAGCTATGCTTTGATGTCCTGTTGAGGCCATCGG	48445492	chr17	48445433	-	FALSE	ENST00000225969	51264	NM_016504	mitochondrial ribosomal protein L27	GO:0070124|GO:0070125|GO:0070126|GO:0032543|GO:0006996|GO:0003735|GO:0005743|GO:0006412|GO:0005762	THC2472245
A_23_P132285	0.0387838	2.21688	2.21688	up	4.74358	4.76927	5.43694	P	P	P	3.3572	3.69347	4.37443	A	P	P	A_23_P132285	MPST	ATTTGGGGTGACATCTCAAAGGCCAGGAATTCCGTTGACTTGTTGGCTGCCAGTAGGGGC	37425728	chr22	37425669	+	FALSE	ENST00000404802	4357	NM_001130517	mercaptopyruvate sulfurtransferase	GO:0043005|GO:0070814|GO:0030054|GO:0016784|GO:0009440|GO:0005743|GO:0045202|GO:0009636|GO:0004792|GO:0070062	THC2568211
A_33_P3360728	0.0418367	2.15777	2.15777	up	7.9828	7.08356	7.54445	P	P	P	6.95041	6.03248	6.27572	P	P	P	A_33_P3360728	BLVRB	ACATGAGGAGCAAAGGAAGGGGGCAATAAATGTTGAGCCAAGAGCTTCAAATTACTCTAG	40953760	chr19	40953701	-	FALSE	ENST00000263368	645	NM_000713	biliverdin reductase B	GO:0005737|GO:0042602|GO:0006778|GO:0005886|GO:0004074|GO:0005654|GO:0044281|GO:0042167|GO:0070062|GO:0055114|GO:0005829	THC2468607
A_33_P3384825	0.0287747	2.14515	2.14515	up	5.78641	5.56757	6.23795	P	P	P	5.16728	4.28099	4.78906	P	P	P	A_33_P3384825	CTDNEP1	ACTGGGATTTTGGGCCACTGGATTTTCCCTAAATTTTTCCCCTCTTTACTCTCCTTCTAT	7147064	chr17	7147005	-	FALSE	ENST00000574205	23399	NM_015343	CTD nuclear envelope phosphatase 1	GO:0005515|GO:0007077|GO:0034504|GO:0031965|GO:0010867|GO:0007276|GO:0090263|GO:0071595|GO:0005635|GO:0005737|GO:0006470|GO:0005789|GO:0006998|GO:0007498|GO:0004722|GO:0016021|GO:0000278	THC2493670
A_24_P161355	0.0123678	2.13997	2.13997	up	9.1395	9.2859	9.58	P	P	P	8.49298	8.332	7.84778	P	P	P	A_24_P161355	---	CAGTATCTCCATGATTACCTTCATCTGCCCCTGGAGACTGTGCCTGTTACTCTATGCTGC	62912333	chr3	62912274	+	FALSE	ENST00000456185	---	---	---	---	THC2623999
A_33_P3297277	0.0117206	2.13553	2.13553	up	10.5772	10.6689	11.0162	P	P	P	9.69708	9.70659	9.611	P	P	P	A_33_P3297277	---	AACCTGCAAGACTCACAAGAGGGGAAGCAGACAGAGATACCTACAGGCGGAGTGCTGTGC	64893102	chr2	64893043	+	FALSE	ENST00000428806	---	---	---	---	THC2526015
A_33_P3272361	0.0408215	2.13141	2.13141	up	6.24086	5.42597	6.20102	P	P	P	4.66194	5.00654	5.03161	P	P	P	A_33_P3272361	CTNNBL1	TTCCGGGAGAACGAGCAAAAGCGCATCCTGGGCTTGCTGGAGAACTTCTAGAGGCACCTT	36500424	chr20	36500365	+	FALSE	ENST00000405275	56259	NM_001281495	"catenin, beta like 1"	GO:0000974|GO:0005515|GO:0008380|GO:0010467|GO:0043065|GO:0006915|GO:0005634|GO:0016445|GO:0005737|GO:0016020|GO:0000398|GO:0005654|GO:0005681|GO:0019899	NP349889
A_23_P141032	0.0215225	2.10342	2.10342	up	7.59349	7.49264	6.9683	P	P	P	6.57039	6.40004	5.84515	P	P	P	A_23_P141032	COX4I1	CAATTTCCACCTCTGTGTGTGTACGAGCTCATGAAAGTGTTGTGAAGAGCGAAGACTTTT	85838569	chr16	85834852	+	FALSE	ENST00000565078	1327	NM_001861	cytochrome c oxidase subunit IV isoform 1	GO:0005515|GO:0007584|GO:0004129|GO:0005743|GO:0005634|GO:0006091|GO:0044281|GO:0055085|GO:0005739|GO:0022904|GO:0016020|GO:0044237|GO:0070062	THC2509882
A_22_P00002048	0.0433289	2.09443	2.09443	up	10.2412	10.9387	10.1141	P	P	P	9.87054	9.21802	9.00155	P	P	P	A_22_P00002048	lnc-BID-2	GGCTGCTGCTGCTGTGGCCATCAGGGAGATAGGGAAATATGTCAATAAGAAATGTATATT	18487386	chr22	18487327	-	FALSE	---	---	BX648058	lnc-BID-2:1	---	NP1160469
A_33_P3420167	0.0336279	2.08507	2.08507	up	7.72415	7.97858	7.52954	P	P	P	7.15963	6.31735	6.46384	P	P	P	A_33_P3420167	---	AATTTATGGACAACACGAGCCGCTCCAGCATCCGCAGTGTAAAAGGCCCCGTGTGTGAGG	71407400	chr7	71407341	+	FALSE	ENST00000455206	---	---	---	---	NP100974
A_24_P178654	0.00888469	2.08007	2.08007	up	6.57622	6.07244	6.52209	P	P	P	5.49912	5.17274	5.36149	P	P	P	A_24_P178654	---	ATCTCAGTTAAAGAAGATGAAGAAGTTTTCAGGGGAGATTGCCTACTCTGGGTGGGTGTT	110867823	chrX	110867764	-	FALSE	ENST00000430258	---	---	---	---	---
A_23_P68087	0.0375132	2.06177	2.06177	up	4.15477	4.72699	3.96411	P	P	P	3.1454	3.40133	3.26896	A	A	A	A_23_P68087	ATIC	GCAGAGAAGAAGGAATGGGTTGAGAAACTGACTGAAGTTTCTATCAGCTCTGATGCCTTC	216213936	chr2	216213877	+	FALSE	ENST00000479093	471	NM_004044	5-aminoimidazole-4-carboxamide ribonucleotide formyltransferase/IMP cyclohydrolase	GO:0021987|GO:0009168|GO:0003360|GO:0003937|GO:0031100|GO:0055086|GO:0021549|GO:0044281|GO:0042803|GO:0005829|GO:0005739|GO:0004643|GO:0046452|GO:0006139|GO:0010035|GO:0016020|GO:0006144|GO:0046654|GO:0009116|GO:0070062|GO:0006189	THC2721283
A_23_P252283	0.0244482	2.06112	2.06112	up	4.31983	4.97778	4.74698	P	P	P	3.74242	3.5334	3.70522	A	A	A	A_23_P252283	RNF135	ATGGGTGAGCTACTCTGGTTGGTAATACTCTGTGCACACATCATTGTAGCCACACATCAT	29326782	chr17	29326723	+	FALSE	ENST00000324689	84282	NM_032322	ring finger protein 135	GO:0005515|GO:0032728|GO:0005737|GO:0004842|GO:0016567|GO:0045087|GO:0016874|GO:0045088|GO:0043021|GO:0008270|GO:0032480|GO:0005829	THC2595032
A_32_P184367	0.0441398	2.05101	2.05101	up	11.4216	11.1277	12.041	P	P	P	10.4639	10.1749	10.9029	P	P	P	A_32_P184367	---	CTCATGAGGGCTTCCACTGTGCTGCCCCCTCTTAATACTCACCAATAAATTCTACTTCCT	119942987	chr9	119942928	-	FALSE	ENST00000431607	---	AK130582	---	---	THC2586632
A_24_P418619	0.00641647	2.04933	2.04933	up	8.52192	8.35351	8.79364	P	P	P	7.80565	7.43079	7.31501	P	P	P	A_24_P418619	RPS10	GAGGCTACGTGAAAGAACACTTTGCCTGGAGACATTTCTACTGGTACCTTACCAATGAGT	34392604	chr6	34392546	-	FALSE	ENST00000460492	6204	NM_001014	ribosomal protein S10	GO:0005515|GO:0010467|GO:0019083|GO:0006614|GO:0019058|GO:0005730|GO:0006415|GO:0006412|GO:0006413|GO:0005829|GO:0006414|GO:0005737|GO:0016020|GO:0000184|GO:0022627|GO:0016032|GO:0005840|GO:0044267|GO:0005925|GO:0070062	THC2600787
A_33_P3409625	0.0276305	2.02357	2.02357	up	5.62743	5.90234	6.34417	P	P	P	5.21656	4.51577	5.09068	P	P	P	A_33_P3409625	SORBS3	CTCTCCCCCAGCCCCACATCCCCTCTGGAAGAGAATGTAAAATAAACCTGGACACAAGGG	22433007	chr8	22432948	+	FALSE	ENST00000240123	10174	NM_005775	sorbin and SH3 domain containing 3	GO:0005515|GO:0031589|GO:0005634|GO:0000122|GO:0005829|GO:0006936|GO:0051495|GO:0051496|GO:0017166|GO:0005200|GO:0007015|GO:0043410|GO:0005856|GO:0007155|GO:0005925|GO:0008134	THC2745544
A_24_P389959	0.0237674	2.01175	2.01175	up	7.42705	7.01941	7.55634	P	P	P	6.54607	5.86849	6.51924	P	P	P	A_24_P389959	COPZ1	GGATTATGCTCACATGCTCCCTTGCCCTGACATTTTTGTAAATTCTGTGCCCTTTGCTGT	54744629	chr12	54744570	+	FALSE	ENST00000550171	22818	NM_016057	"coatomer protein complex, subunit zeta 1"	GO:0030126|GO:0006890|GO:0061024|GO:0006891|GO:0006886|GO:0048205|GO:0005829	THC2485525
A_33_P3308050	0.0255868	2.00615	2.00615	up	6.55245	5.89526	5.90061	P	P	P	4.78856	5.2865	5.30616	P	P	P	A_33_P3308050	EIF4E2	GAGTGCTTAACCTACCTCCCAACACCATTATGGAATACAAAACTCACACCGACAGCATCA	233431923	chr2	233431864	+	FALSE	ENST00000258416	9470	NM_004846	eukaryotic translation initiation factor 4E family member 2	GO:0017148|GO:0005515|GO:0000339|GO:0019221|GO:0003743|GO:0001701|GO:0031625|GO:0008135|GO:0006413|GO:0005845|GO:0005829	THC2539880
A_24_P763243	0.0496269	2.00442	2.00442	up	11.3527	11.1815	12.0739	P	P	P	10.7184	10.1909	10.7819	P	P	P	A_24_P763243	EEF1A1	AGATGGCCCTAAATTCTTGAAGTCTGGTGATGCTGCCATTGTTGATATGGTTCCTGGCAA	74227853	chr6	74227794	-	FALSE	ENST00000434005	1915	NM_001402	eukaryotic translation elongation factor 1 alpha 1	GO:0005515|GO:0010467|GO:0005853|GO:0006355|GO:0019901|GO:0005886|GO:0003924|GO:0005730|GO:0005634|GO:0003746|GO:0005525|GO:0006412|GO:0005615|GO:0006351|GO:0006414|GO:0005829|GO:0005737|GO:0016020|GO:0071364|GO:0044267|GO:0070062	NP1183222
Fold-Change cut-off: 2.0
P-value cut-off: 0.05
compare: g2_VS_g1
foldchange: The ratio (not logarithm) of normalized intensities between two conditions; formula: foldchange=average(power(2,signal(CASE)))/average(power(2,signal(CONTROL))).
foldchange (abs): The absolute ratio (not logarithm) of normalized intensities between two conditions; formula: if foldchange>1,foldchange(abs)=foldchange,foldchange<1,foldchange(abs)=1/foldchange.
